# Supplementary material for: The Colombian Zika Virus Isolate (COL345Si) Replicates in Prostate Adenocarcinoma Cells and Modulates the Antiviral Response
Source: MDPI journal article supplement (doi:10.3390/microorganisms10122420), 2022-12-07
Supplement: s1 [file s1]

Supplementary Materials

| Strains                    | Gen Bank   | Lineage | Codon position |       |        |       |       |       |       |       |       |       |        |        |        |        |      |        |      |      |        |        |        |        |        |        |
|----------------------------|------------|---------|----------------|-------|--------|-------|-------|-------|-------|-------|-------|-------|--------|--------|--------|--------|------|--------|------|------|--------|--------|--------|--------|--------|--------|
|                            |            |         | 80             | 106   | 107    | 123   | 130   | 139   | 151   | 691   | 763   | 982   | 1059   | 1118   | 1274   | 1477   |      | 2086   |      |      | 2611   | 2634   | 3213   | 3353   | 3392   | 3403   |
|                            |            |         | C              | C     | C*     | prM   | prM   | prM   | prM   | E     | E     | NS1   | NS1    | NS1    | NS2A   | NS2A   | NS2B | NS3    | NS4A | NS4B | NS5    | NS5    | NS5    | NS5    | NS5    | NS5    |
| ZIKV COL345SI              | MH179341.1 | Asian   | I80            | A160  | D107E* | V123A | N130S | S139N | M151L | H691  | V763M | A982V | K1059  | R1118W | P1274L | A1477T |      | Y2086H |      |      | A2611  | M2634V | T3213  | T3353A | M3392V | V3403M |
| ZIKV (Meta-Colombia)       | MH544701.1 | Asian   | I80            | A160  | D107   | V123A | N130S | S139N | M151L | H691Y | V763M | A982V | K1059E | R1118W | P1274L | A1477T |      | Y2086H |      |      | A2611  | M2634V | T3213I | T3353A | M3392V | V3403M |
| ZIKV/ Puerto Rico PRVABC59 | KJ501215.1 | Asian   | I80T           | A106T | D107   | V123A | N130S | S139N | M151L | H691  | V763M | A982V | K1059  | R1118  | P1274L | A1477T |      | Y2086H |      |      | A2611V | M2634V | T3213  | T3353  | M3392V | V3403M |
| ZIKV Cambodia              | KU955593.1 | Asian   | I80            | A160  | D107   | V123  | N130  | S139  | M151  | H691  | V763  | A982  | K1059  | R1118  | P1274  | A1477  |      | Y2086  |      |      | A2611  | M2634  | T3213  | T3353  | M3392  | V3403  |

Figure S1. Identification of the mutations of a Colombian Zika virus isolate. Asterisks indicate the capsid protein mutation, C: D107E

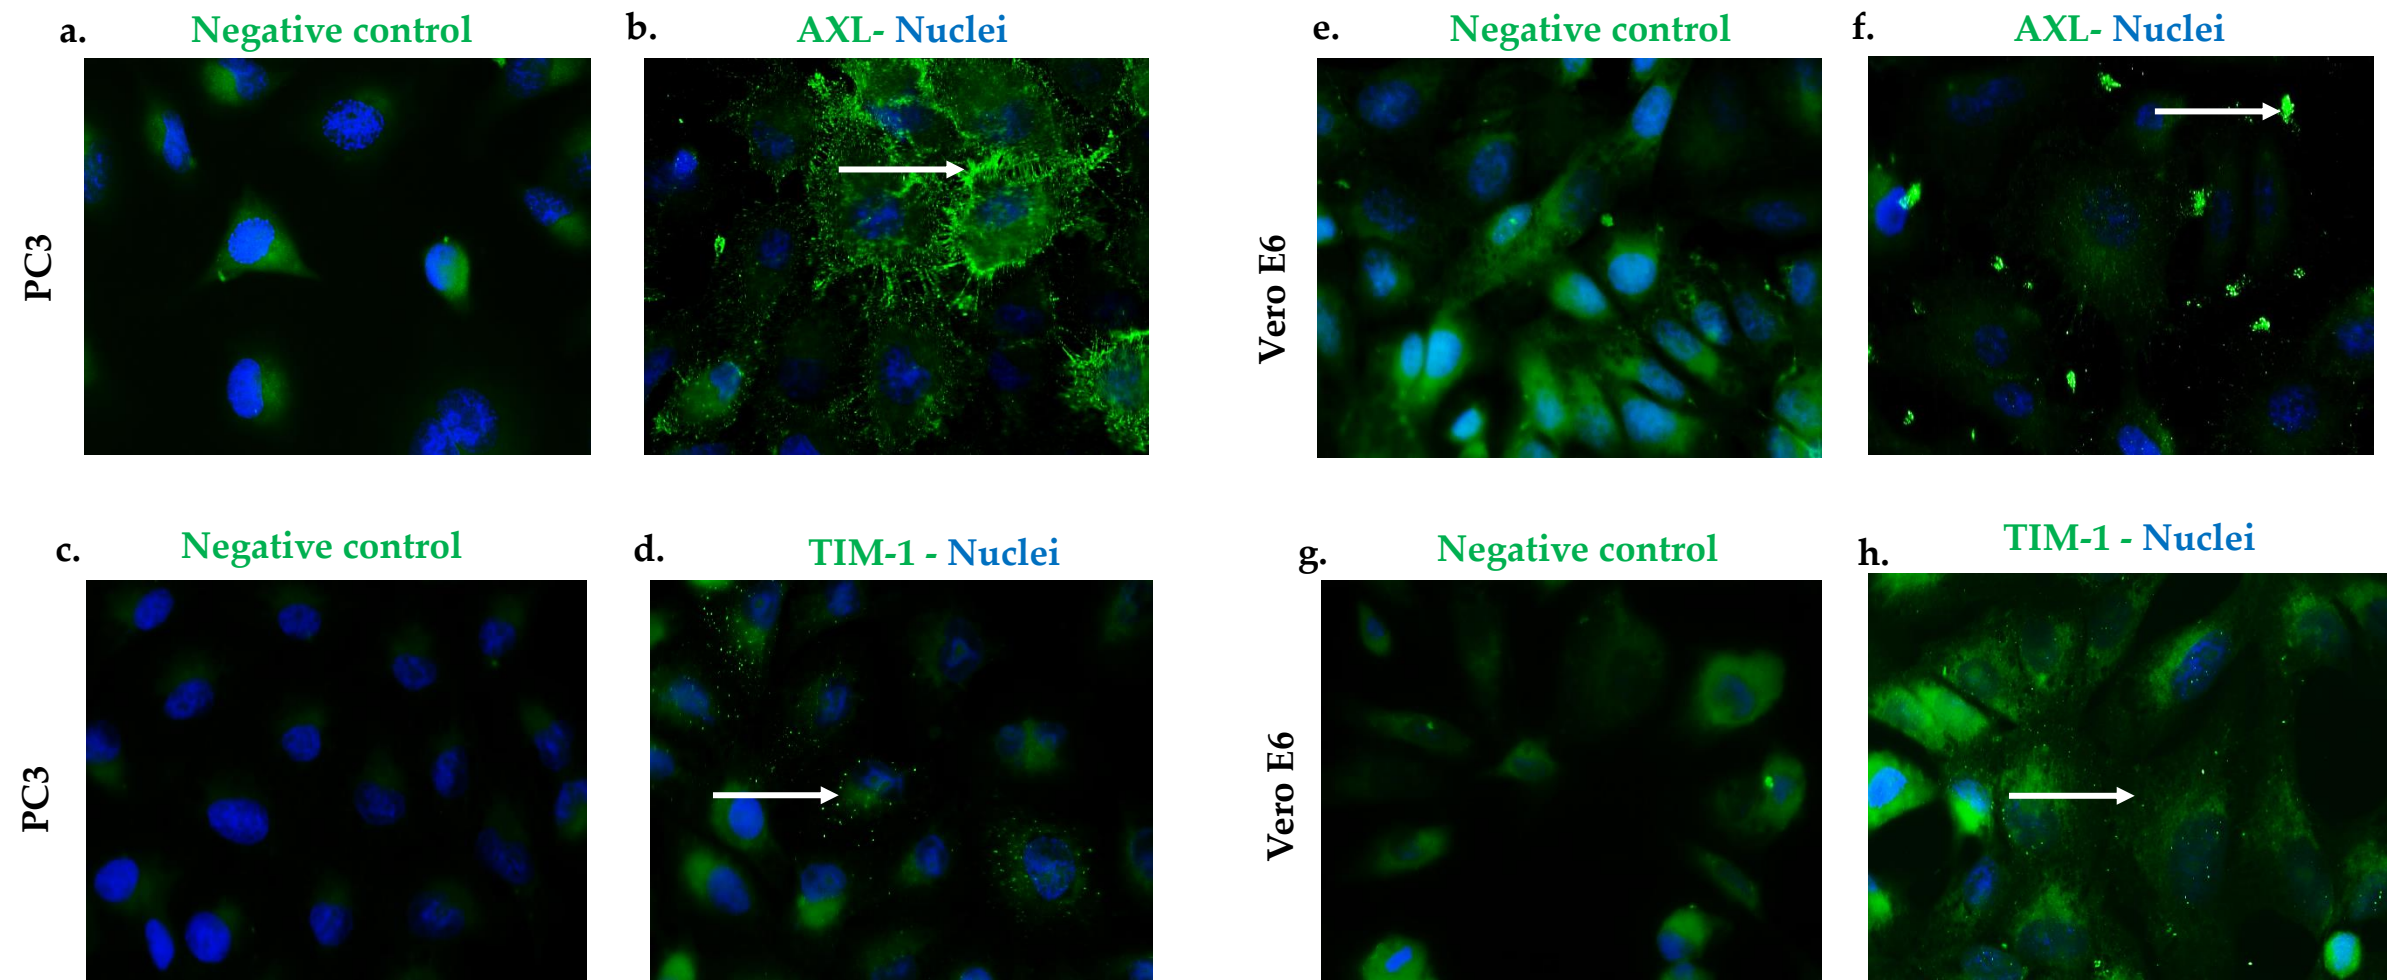

**Figure S2.** PC3 and Vero E6 cells express AXL and TIM-1 cell receptors. Pictures were captured at a 60× magnification. The photographs represent the subcellular location of AXL (**b,f**) and TIM-1 (**d,h**), and they correspond to three independent triplicate experiments. AXL and TIM-1 (green), and nuclei (blue). Figures **a**, **c**, **e**, and **g** are cells antibody secondary labeled and correspond to the negative controls

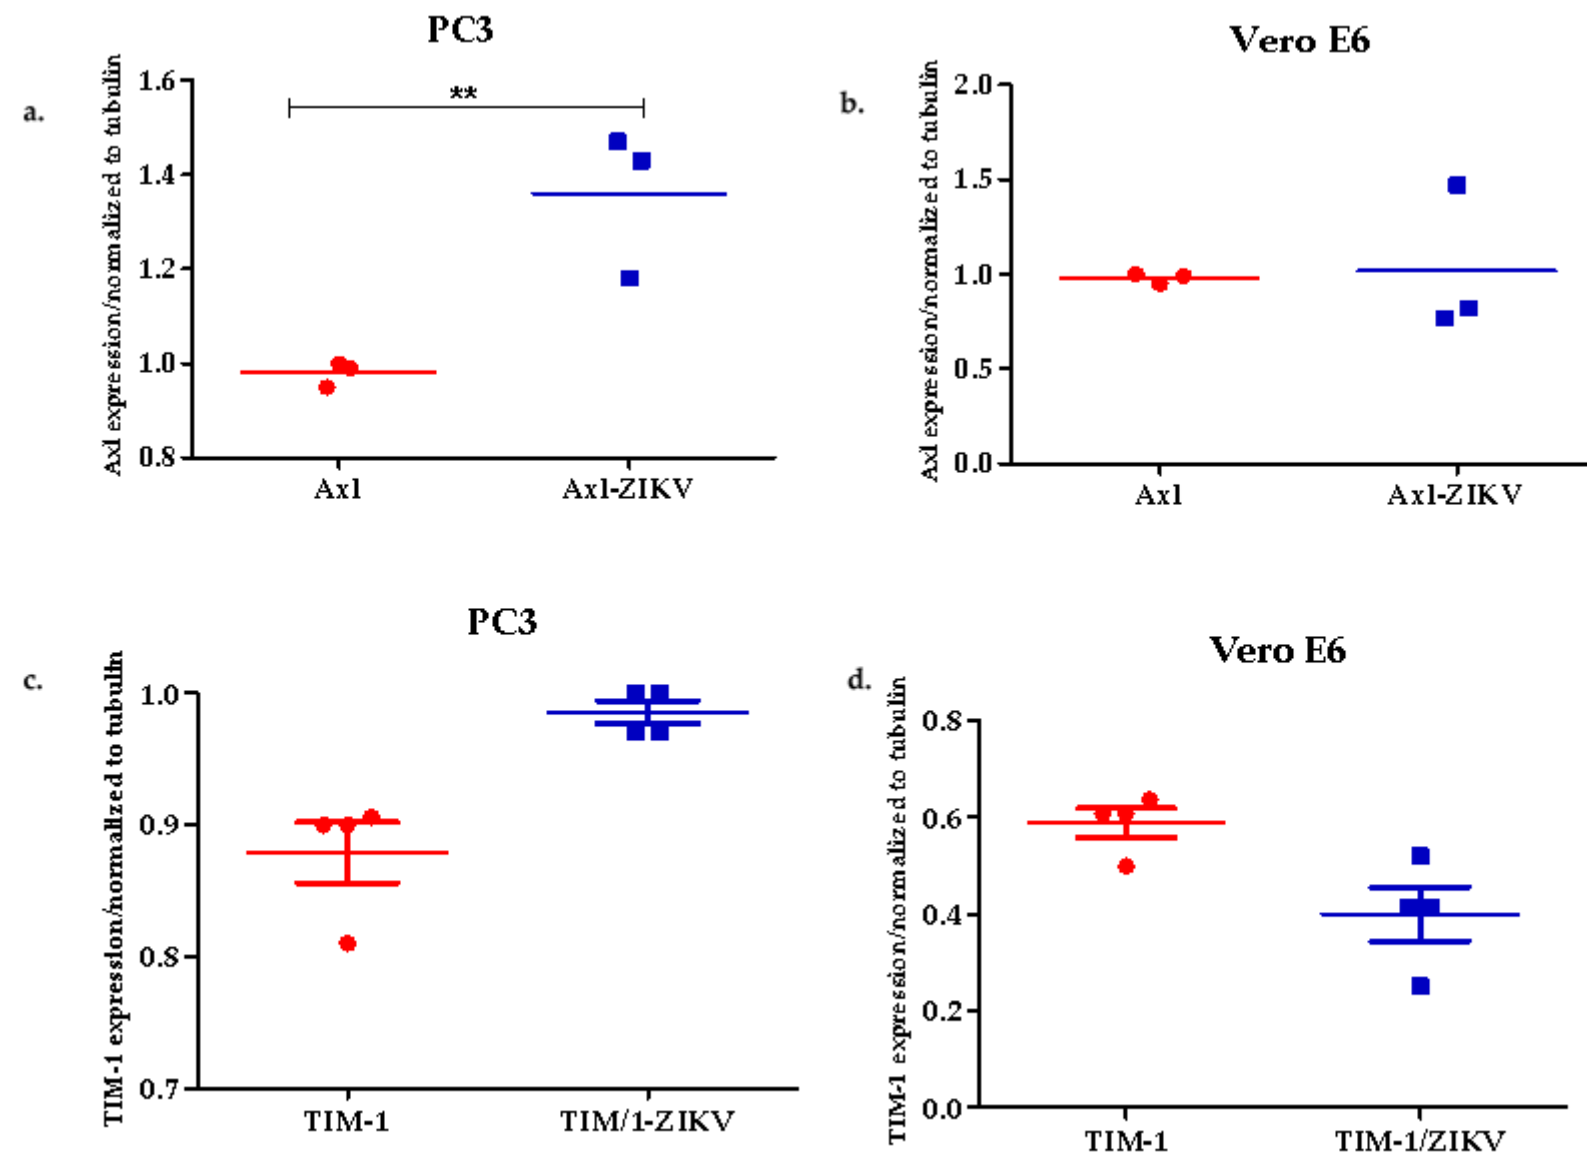

**Figure S3.** Detection of the AXL and TIM-1 receptors on infected and uninfected PC3 (MOI=3) by 24 h (a-c) and Vero E6 (b-d) cells through In-Cell Western.

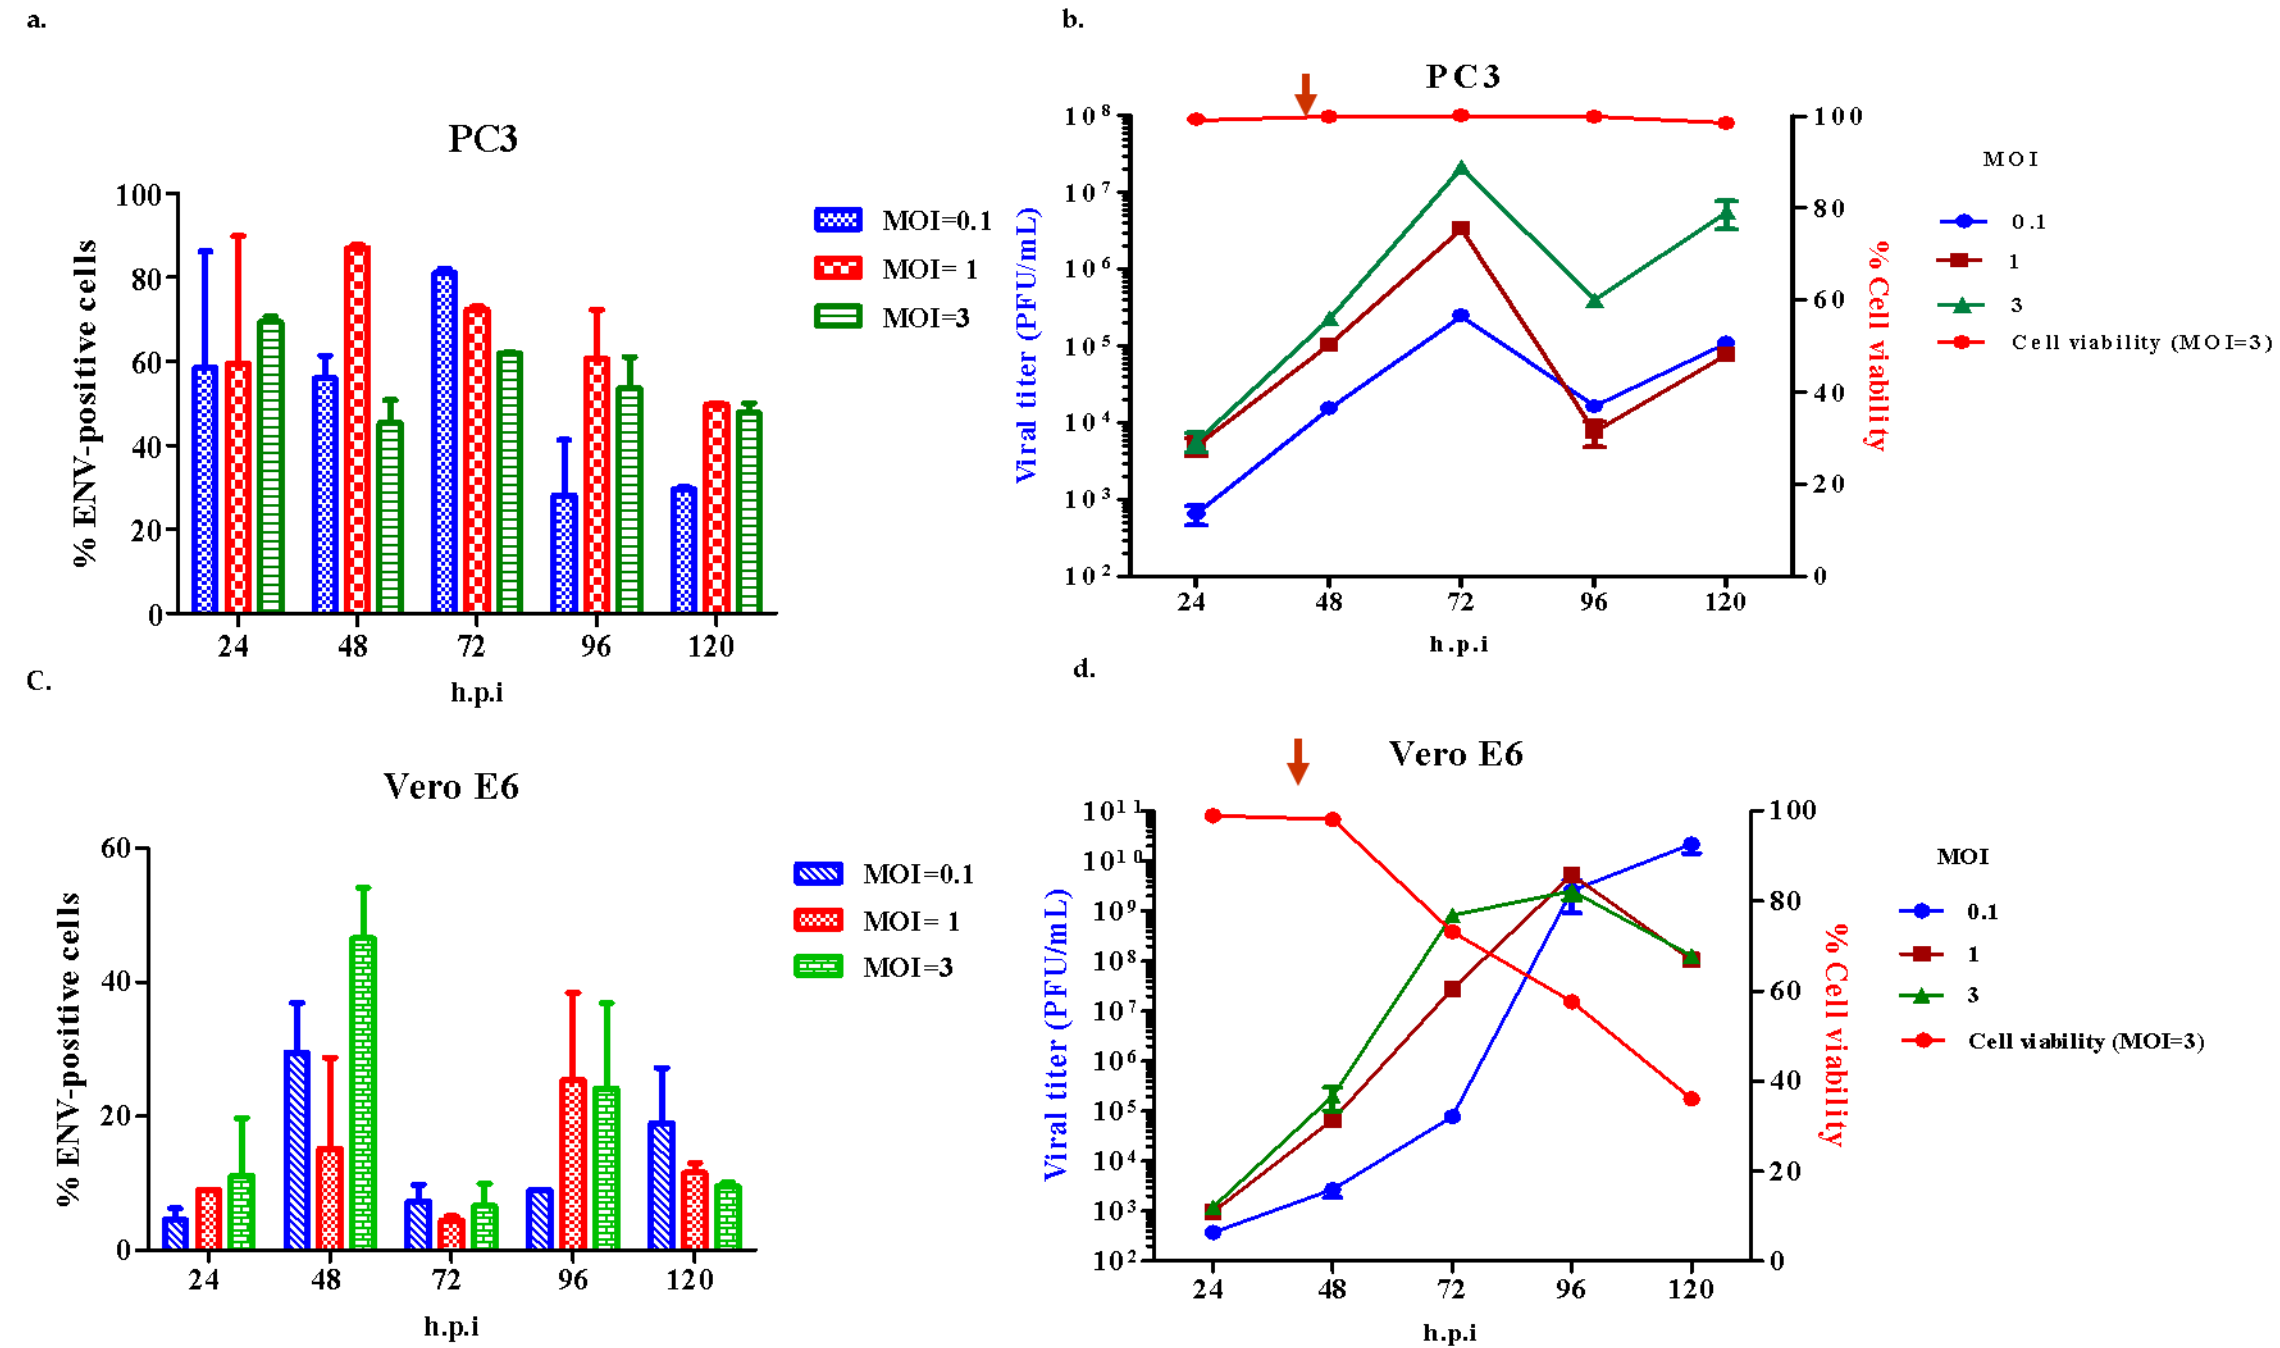

**Figure S4.** Zika virus replicates in PC3 and Vero E6 cells. The graphic represents the percentage of the viral envelope protein and plaque forming units viral on PC3 (a-b) and Vero E6 (c- d) cells infected with MOI= 0.1, 1, and 3

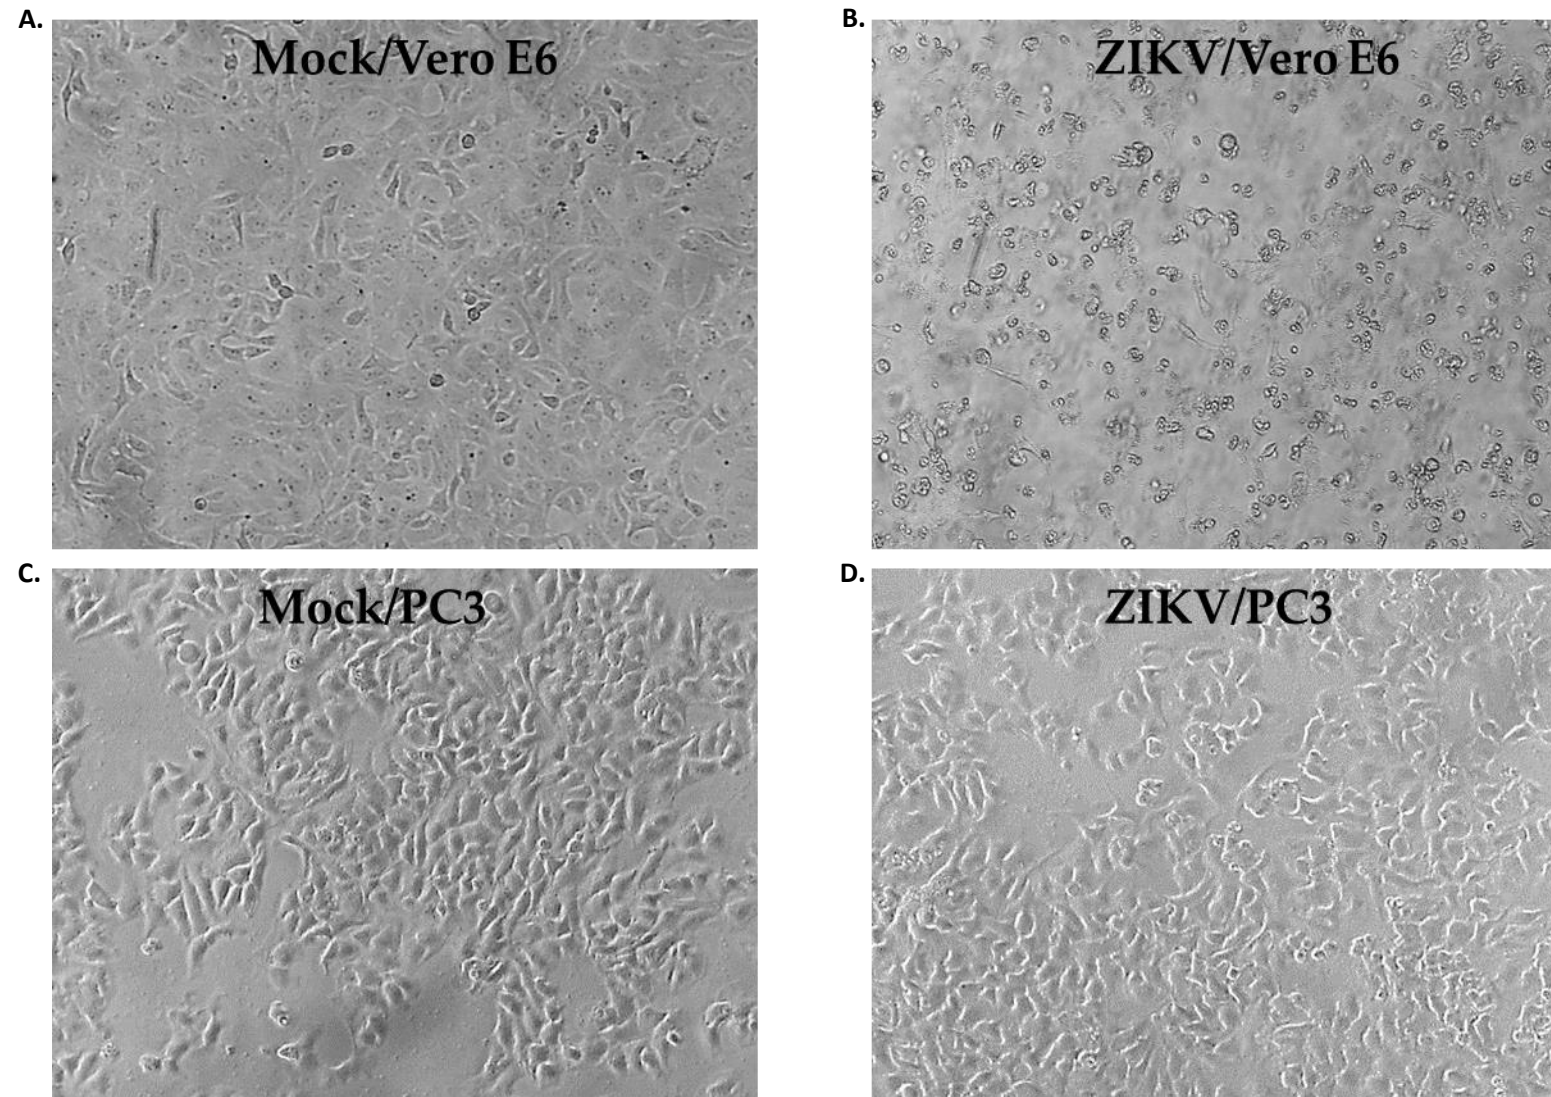

**Figure S5. Cytopathic effects Vero E6 y PC3 cell lines during ZIKV infection.** Cytopathic effects on Vero E6 (b) infected with ZIKV consisting of cell rounding and detachment at 5 days- post-infection. ZIKV did not cause cytopathic effects in PC3 cells (d).



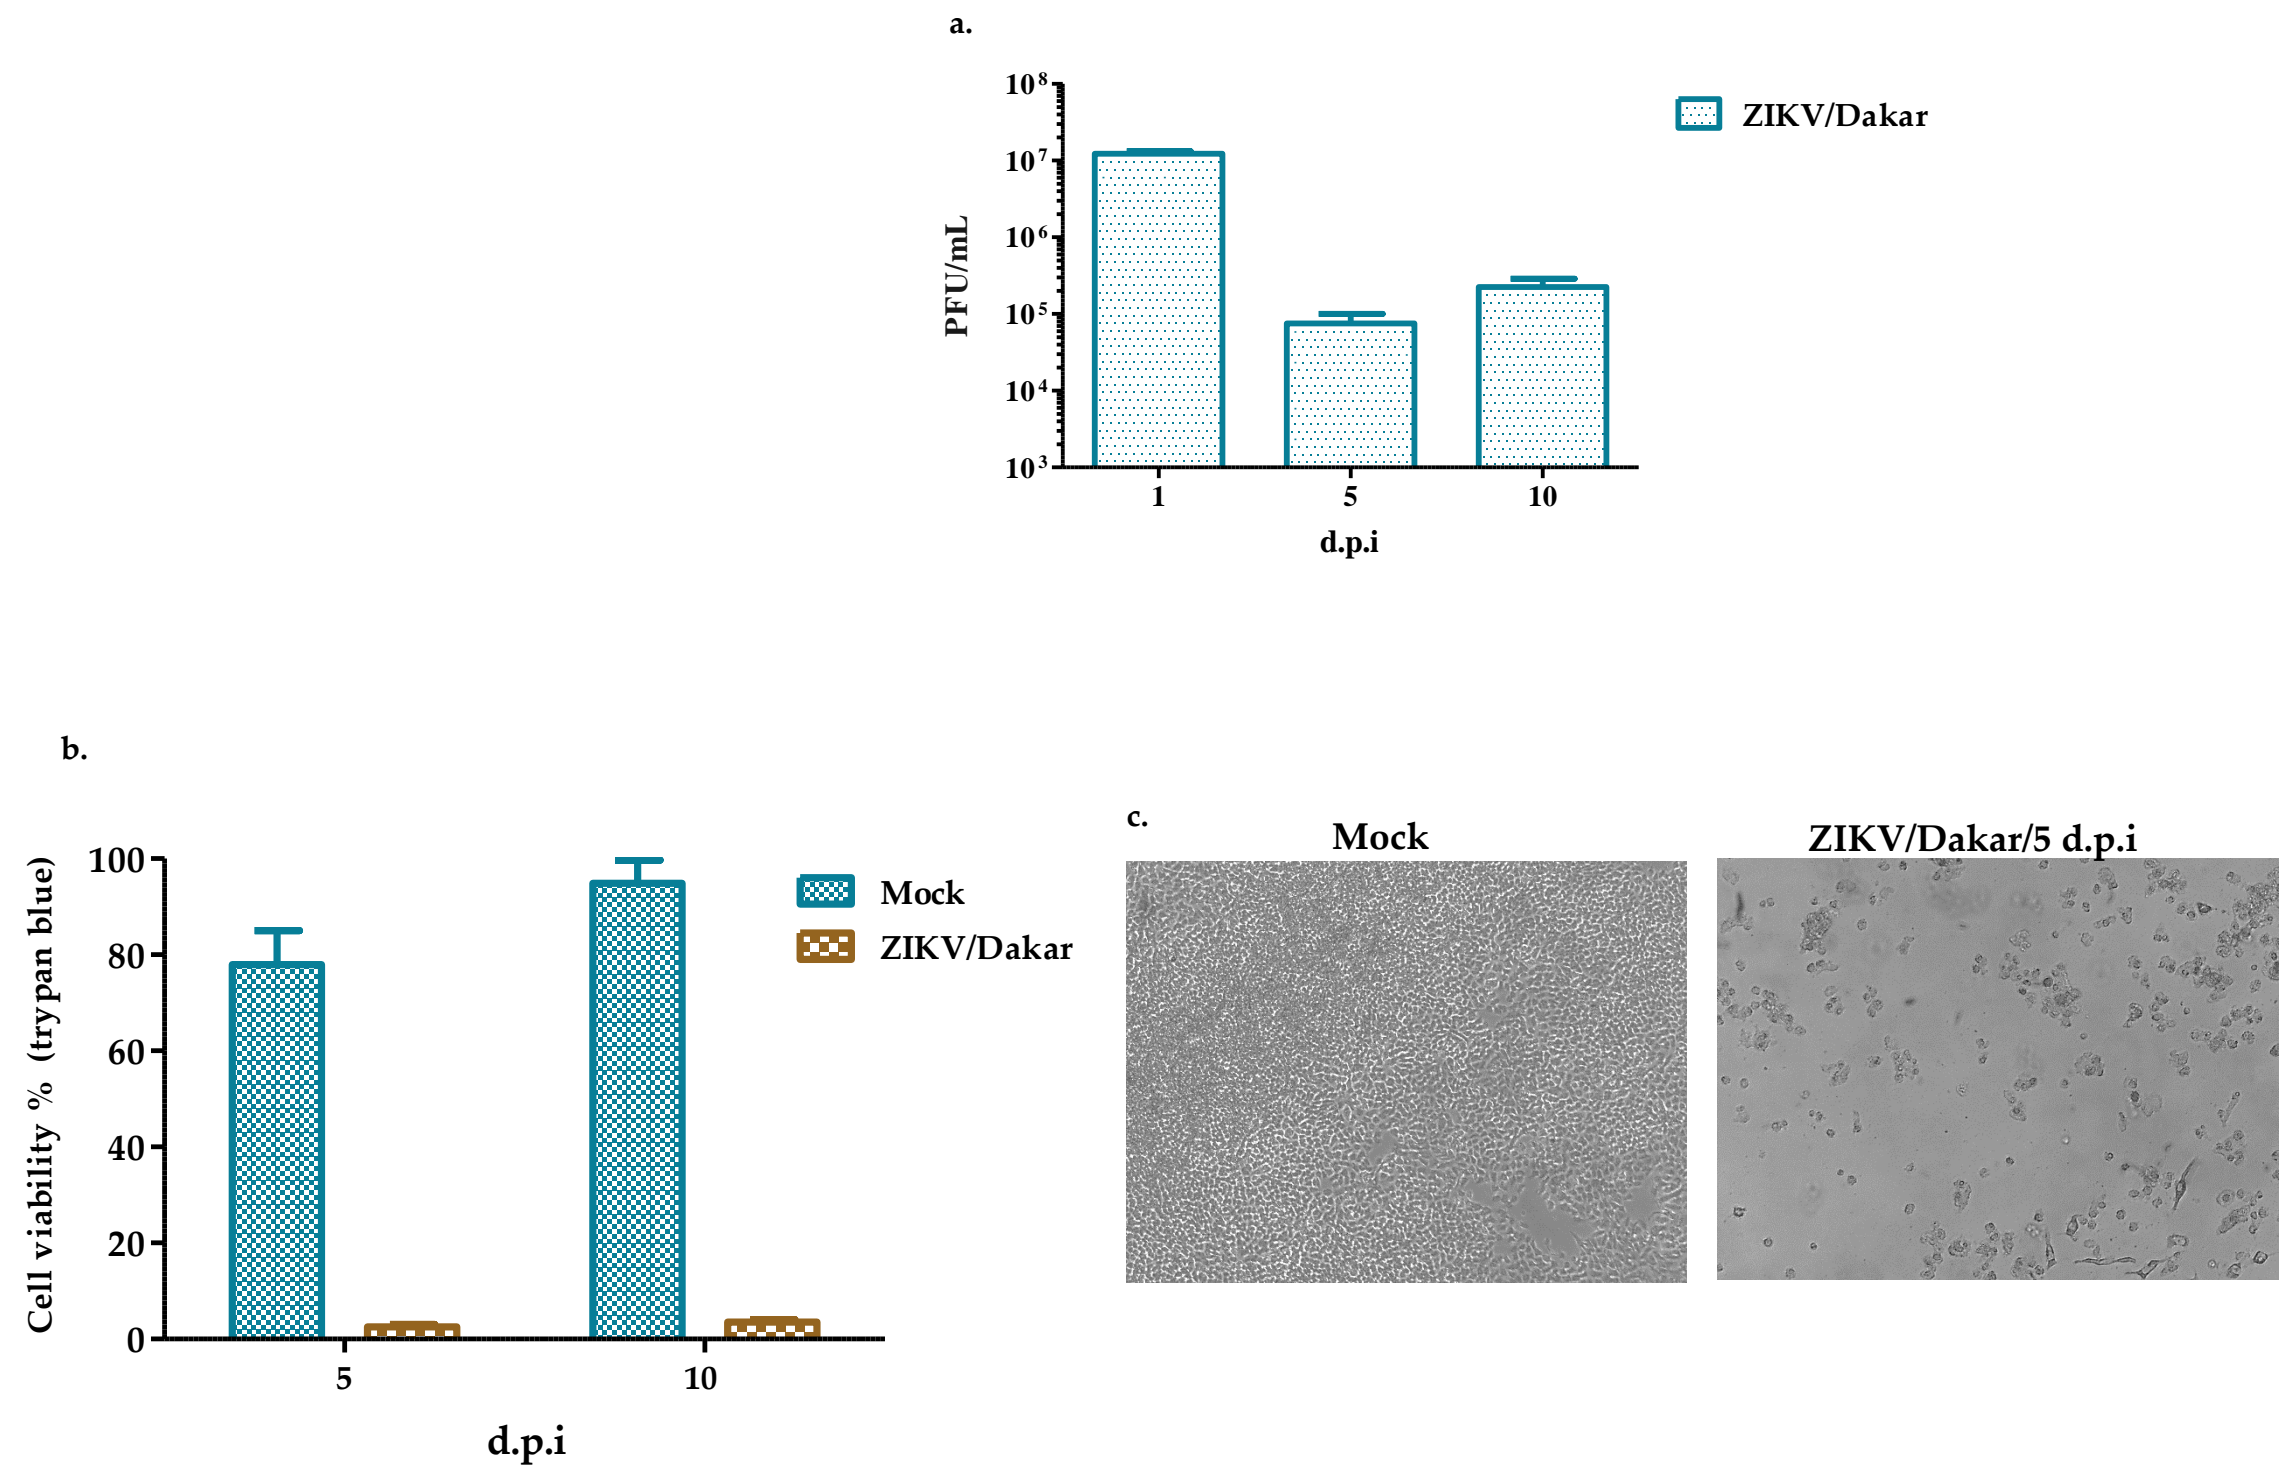

**Figure S6.** Zika- Dakar Virus replication (a) produces a cytopathic effect in the PC3 cells at 5 or 10 post-infection days (d.p.i) (b-c). Figure b shows the most representative picture.
